# Supplementary material for: Modelling wind farm effects in HARMONIE–AROME (cycle 43.2.2) – Part 1: Implementation and evaluation
Source: Copernicus journal article supplement (doi:10.5194/gmd-17-2855-2024), 2024-04-16
Supplement: Supplementary file 1 [file gmd-17-2855-2024-supplement.zip]

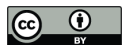

## *Supplement of*

# **Modelling wind farm effects in HARMONIE–AROME (cycle 43.2.2) – Part 1: Implementation and evaluation**

**Jana Fischereit et al.**

*Correspondence to:* Jana Fischereit (janf@dtu.dk)

- gmd-17-2855-2024-supplement-title-page.pdf
- Supplement\_material
  - README.md
  - modified\_HARMONIE
    - \* ecf
    - \* input\_files
    - \* nam
    - \* scr
    - \* src
  - modified\_WRF
    - \* Registry
    - \* doc
    - \* dyn\_em
    - \* main
    - \* phys

The copyright of individual parts of the supplement might differ from the article licence.
